# Supplementary material
Source: PubMed Central journal article supplement (PMC1767745)
Supplement: heart_89_7_793__1.pdf [file heart_89_7_793__1.pdf]

## Web-only References

1. Wong-Staal F, Gallo RC. Human T-lymphotropic retroviruses. *Nature* 1985;**317**:395-403.
2. Grody WW, Cheng L, Lewis W. Infection of the heart by the human immunodeficiency virus. *Am J Cardiol* 1990;**66**:203-6.
3. Barbaro G, Fisher SD, Giancaspro G, *et al.* HIV-associated cardiovascular complications: a new challenge for emergency physicians. *Am J Emerg Med* 2001;**19**:566-74.
4. Epstein JE, Eichbaum QG, Lipshultz SE. Cardiovascular manifestations of HIV infection. *Compr Ther* 1996;**22**:485-91.
5. Ferguson DW, Volpp BD. Cardiovascular complications of AIDS. *Heart Dis Stroke* 1994;**3**:388-94.
6. Currie PF, Boon NA. Cardiac involvement in human immunodeficiency virus infection. *Q J Med* 1993;**86**:751-3.
7. De Castro S, Migliau G, Silvestri A, *et al.* Heart involvement in AIDS: a prospective study at various stages of the disease. *Eur Heart J* 1992;**13**:1452-9.
8. Kaul S, Fishbein MC, Siegel RJ. Cardiac manifestations of acquired immune deficiency syndrome: a 1991 update. *Am Heart J* 1991;**122**:535-44.
9. Cohen IS, Anderson DW, Vermani R, *et al.* Congestive cardiomyopathy in association with the acquired immunodeficiency syndrome. *N Engl J Med* 1986;**315**:628-30.
10. Barbaro G, Di Lorenzo G, Soldini M, *et al.* The intensity of myocardial expression of inducible nitric oxide synthase influences the clinical course of human immunodeficiency virus-associated cardiomyopathy. *Circulation* 1999;**100**:633-9.
11. Currie PF, Jacob AJ, Foreman AR, *et al.* Heart muscle disease related to HIV infection: prognostic implications. *BMJ* 1994;**309**:1605-7.
12. Currie PF, Goldman JH, Caforio ALP, *et al.* Cardiac autoimmunity in HIV related heart muscle disease. *Heart* 1998;**79**:599-604.

13. Lipshultz SE. Dilated cardiomyopathy in HIV-infected patients. *N Engl J Med* 1998;**339**:1153-4.
14. Barbaro G, Di Lorenzo G, Soldini M, *et al.* Clinical course of cardiomyopathy in HIV-infected patients with or without encephalopathy related to the myocardial expression of TNF $\alpha$  and iNOS. *AIDS* 2000;**14**:827-38.
15. Dworkin BM. Selenium deficiency in HIV infection and the acquired immunodeficiency syndrome (AIDS). *Chem-Biol Interact* 1994;**91**:181-6.
16. Coudray N, De Zuttere D, Force D, *et al.* Left ventricular diastolic function in asymptomatic and symptomatic human immunodeficiency virus carriers : an echocardiographic study. *Eur Heart J* 1995;**16**:61-7.
17. Gullestad L, Aass H, Fjeld JG, *et al.* Immunomodulating therapy with intravenous immunoglobulin in patients with chronic heart failure. *Circulation* 2001;**103**:220-5.
18. Cammarosano C, Lewis W. Cardiac lesion in acquired immune deficiency syndrome (AIDS). *J Am Coll Cardiol* 1985;**5**:703-6.
19. Brettle RP, Chiswick A, Bell J, *et al.* Pre-AIDS deaths in HIV infection related to intravenous drug abuse. *Q J Med* 1997;**90**:617-29.
20. Nahass RG, Weinstein MP, Bartell J, *et al.* Infective endocarditis in intravenous drug users : a comparison of human immunodeficiency virus type 1 negative and positive patients. *J Infect Dis* 1990;**162**:967-70.
21. Francis CK. Cardiac involvement in AIDS. *Curr Probl Cardiol* 1990;**15**:574-639.
22. Karrel T, Schaffner A, Vogt P, *et al.* Endocarditis in intravenous drug addicts and HIV infected patients : possibilities and limitations of surgical treatment. *J Heart Valve Dis* 1993;**2**:140-7.
23. Chen Y, Brennessel D, Walters J, *et al.* Human immunodeficiency virus-associated pericardial effusion: report of 40 cases and review of the literature. *Am Heart J* 1999;**137**:516-21.
24. Cegielski JP, Ramiya K, Lallinger GJ, *et al.* Pericardial disease and human immunodeficiency virus in Dar es Salaam, Tanzania. *Lancet* 1990;**335**:209-12.
25. Levy WS, Simon GL, Rios JC, *et al.* Prevalence of cardiac abnormalities in human immunodeficiency virus infection. *Am J Cardiol* 1989;**63**:86-9.

26. Estok L, Wallach F. Cardiac tamponade in a patient with AIDS: a review of pericardial disease in patients with HIV infection. *Mt Sinai J Med* 1998;**65**:33-9.
27. Wu AY, Forouhar F, Cartun RW, *et al.* Identification of human immunodeficiency virus in the heart of a patient with acquired immunodeficiency syndrome. *Mod Pathol* 1990;**3**:625-30.
28. Silver MA, Macher AM, Reichert CM, *et al.* Cardiac involvement by Kaposi's sarcoma in acquired immunodeficiency syndrome (AIDS). *Am J Cardiol* 1984;**53**:983-5.
29. Constantino A, West TE, Gupta M, *et al.* Primary cardiac lymphoma in a patient with acquired immune deficiency syndrome. *Cancer* 1987;**60**:2801-5.
30. Joshi VV, Pawel B, Conner E, *et al.* Arteriopathy in children with acquired immunodeficiency syndrome. *Pediatr Pathol* 1987;**7**:261-75.
31. Paton P, Tabib A, Loire R, *et al.* Coronary artery lesions and human immunodeficiency virus infection. *Res Virol* 1993;**144**:225-31.
32. Carpenter CCJ, Cooper DA, Fischl MA, *et al.* Antiretroviral therapy in adults. Updated recommendations of the International AIDS society – USA panel. *JAMA* 2000;**283**:381-90.
33. Behrens G, Dejam A, Schmidt H, *et al.* Impaired glucose tolerance, beta cell function and lipid metabolism in HIV patients under treatment with protease inhibitors. *AIDS* 1999;**13**:F63-70.
34. Mary-Crause M, Cotte L, Simon-Coutellier A, *et al.* Myocardial infarction (MI) in HIV seropositive men in the era of HAART treatments in France. *Collected abstracts of the XIII International AIDS conference, Durban, South Africa* 2000;**2**:86. (Abstract).
35. Hornberger LK, Lipshultz SE, Easley KA, *et al.* Cardiac structure and function in fetuses of mothers infected with HIV. The prospective P<sup>2</sup>C<sup>2</sup>HIV multicenter study. *Am Heart J* 2000;**140**:575-84.
36. Luginbuhl LM, Orav EJ, McIntosh K, *et al.* Cardiac morbidity and related mortality in children with HIV infection. *JAMA* 1993;**269**:2869-75.
37. Kim KK, Factor SM. Membranoproliferative glomerulonephritis and plexogenic pulmonary arteriopathy in a homosexual man with acquired immunodeficiency syndrome. *Hum Pathol* 1987;**18**:1293-6.

38. Becker K, Görlach I, Frieling T, *et al.* Characterization and natural course of cardiac autonomic nervous dysfunction in HIV-infected patients. *AIDS* 1997;**11**:751-7.
39. Neild PJ, Amadi A, Ponikowski P, *et al.* Cardiac autonomic dysfunction in AIDS is not secondary to heart failure. *Int J Cardiol* 2000;**74**:133-7.
40. Aris A, Pomar JL, Saura E. Cardiopulmonary bypass in HIV-positive patients. *Ann Thorac Surg* 1993;**55**:1104-8.
41. Brenner B, Kauffman J, Sachter JJ. Comparison of the reluctance of house staff of metropolitan and suburban hospitals to perform mouth-to-mouth resuscitation. *Resuscitation* 1996;**32**:5-12.

#### **Not cited**

42. Merrill WH. What's new in cardiac surgery. *J Am Coll Surg* 2002;**194**:617-35.
43. Egger M, Junghans C, Friis-Moller N, *et al.* Highly active antiretroviral therapy and coronary heart disease: the need for perspective. *AIDS* 2001;**15 (Suppl. 5)**:S193-201.
44. Barbaro G, Di Lorenzo G, Grisorio B, *et al.* Cardiac involvement in the acquired immunodeficiency syndrome. A multicenter clinical-pathological study. *AIDS Res Hum Retroviruses* 1998;**14**:1071-7.
